# Supplementary material for: Pathogenic Leptospira are widespread in the urban wildlife of southern California
Source: PubMed Central journal article supplement (PMC10474285; doi:10.1038/s41598-023-40322-2), 2023-09-01
Supplement: 41598_2023_40322_MOESM1_ESM.pdf [file 41598_2023_40322_MOESM1_ESM.pdf]

**Table S2:** Table of reference serovars and strains used in microscopic agglutination testing at the United States Centers for Disease Control and Prevention (CDC) and the California Animal Health and Food Safety Lab System (CAHFS).

| Laboratory | Species                  | Serogroup           | Serovar             | Strain              |
|------------|--------------------------|---------------------|---------------------|---------------------|
| CDC        | <i>L. interrogans</i>    | Australis           | Australis           | Ballico             |
|            | <i>L. interrogans</i>    | Australis           | Bratislava          | Jez-Bratislava      |
|            | <i>L. interrogans</i>    | Autumnalis          | Autumnalis          | Akiyami A           |
|            | <i>L. borgpetersenii</i> | Ballum              | Ballum              | Mus 127             |
|            | <i>L. interrogans</i>    | Bataviae            | Bataviae            | Van Tienen          |
|            | <i>L. interrogans</i>    | Canicola            | Canicola            | Ruebush             |
|            | <i>L. weillii</i>        | Celledoni           | Celledoni           | Celledoni           |
|            | <i>L. kirschneri</i>     | Cynopteri           | Cynopteri           | 3522 C              |
|            | <i>L. interrogans</i>    | Djasiman            | Djasiman            | Djasiman            |
|            | <i>L. kirschneri</i>     | Grippotyphosa       | Grippotyphosa       | Moskva V            |
|            | <i>L. santarosai</i>     | Hebdomadis          | Borincana           | HS 622              |
|            | <i>L. interrogans</i>    | Icterohaemorrhagiae | Icterohaemorrhagiae | RGA                 |
|            | <i>L. interrogans</i>    | Icterohaemorrhagiae | Mankarso            | Mankarso            |
|            | <i>L. interrogans</i>    | Javanica            | Javanica            | Veldrat Bataviae 46 |
|            | <i>L. santarosai</i>     | Mini                | Georgia             | LT 117              |
|            | <i>L. interrogans</i>    | Pomona              | Pomona              | Pomona              |
|            | <i>L. interrogans</i>    | Pyrogenes           | Pyrogenes           | Salinem             |
|            | <i>L. interrogans</i>    | Pyrogenes           | Alexi               | HS 616              |
|            | <i>L. interrogans</i>    | Sejroe              | Wolffi              | 3705                |
|            | <i>L. borgpetersenii</i> | Tarassovi           | Tarassovi           | Perepelitsin        |
| CAHFS      | <i>L. interrogans</i>    | Australis           | Bratislava          | Jez-Bratislava      |
|            | <i>L. interrogans</i>    | Canicola            | Canicola            | Hond Utrecht IV     |
|            | <i>L. interrogans</i>    | Grippotyphosa       | Grippotyphosa       | Andaman             |
|            | <i>L. interrogans</i>    | Sejroe              | Hardjo              | Hardjoprajitno      |
|            | <i>L. interrogans</i>    | Icterohaemorrhagiae | Copenhageni         | M20                 |
|            | <i>L. interrogans</i>    | Pomona              | Pomona              | Pomona              |

**Table S3: *Leptospira* serovars and antibody titer levels for all California wildlife samples.** Total number of animals tested by host species and serovar (n), the number of animals that exhibited a maximum titer at each titer level, the total number of animals that tested positive to each serovar (N), and the row-wise seropositivity (% positive) with binomial confidence intervals (95% CI). Serovars with no positive results for a given host species are not shown.

| Common Name       | Scientific Name                 | n      | Serovar              | 100 | 200       | 400 | 800 | 1600 | 3200 | >=6400       | N  | Prevalence (%)    |
|-------------------|---------------------------------|--------|----------------------|-----|-----------|-----|-----|------|------|--------------|----|-------------------|
| Bobcat            | <i>Lynx rufus</i>               | 7      | Autumnalis           | 0   | 0         | 0   | 0   | 0    | 1    | 0            | 1  | 14.29 (0.4-57.9)  |
|                   |                                 | 7      | Bataviae             | 1   | 0         | 0   | 0   | 0    | 0    | 0            | 1  | 14.29 (0.4-57.9)  |
|                   |                                 | 11     | Bratislava           | 2   | 1         | 0   | 1   | 0    | 0    | 0            | 4  | 36.36 (10.9-69.2) |
|                   |                                 | 11     | Canicola             | 0   | 0         | 0   | 0   | 1    | 0    | 0            | 1  | 9.09 (0.2-41.3)   |
|                   |                                 | 7      | Cynopteri            | 1   | 0         | 0   | 0   | 0    | 0    | 0            | 1  | 14.29 (0.4-57.9)  |
|                   |                                 | 7      | Djasiman             | 0   | 0         | 0   | 0   | 0    | 1    | 0            | 1  | 14.29 (0.4-57.9)  |
|                   |                                 | 11     | Grippotyphosa        | 0   | 0         | 0   | 0   | 1    | 0    | 0            | 1  | 9.09 (0.2-41.3)   |
|                   |                                 | 11     | Icterohaemorrhagiae  | 0   | 1         | 0   | 0   | 0    | 1    | 0            | 2  | 18.18 (2.3-51.8)  |
|                   |                                 | 7      | Mankarso             | 0   | 0         | 0   | 0   | 1    | 0    | 0            | 1  | 14.29 (0.4-57.9)  |
|                   |                                 | 11     | Pomona               | 0   | 2         | 0   | 0   | 0    | 1    | 0            | 3  | 27.27 (6-61)      |
|                   |                                 | 7      | Pyrogenes            | 0   | 0         | 0   | 0   | 1    | 0    | 0            | 1  | 14.29 (0.4-57.9)  |
|                   |                                 | 7      | Wolffi               | 1   | 0         | 0   | 0   | 0    | 0    | 0            | 1  | 14.29 (0.4-57.9)  |
|                   |                                 | Coyote | <i>Canis latrans</i> | 46  | Australis | 0   | 1   | 0    | 0    | 0            | 0  | 0                 |
| 46                | Autumnalis                      |        |                      | 3   | 4         | 2   | 1   | 0    | 2    | 0            | 12 | 26.09 (14.3-41.1) |
| 74                | Bratislava                      |        |                      | 5   | 3         | 1   | 1   | 0    | 0    | 2            | 12 | 16.22 (8.7-26.6)  |
| 74                | Canicola                        |        |                      | 0   | 1         | 0   | 0   | 0    | 0    | 0            | 1  | 1.35 (0-7.3)      |
| 46                | Cynopteri                       |        |                      | 1   | 0         | 0   | 0   | 0    | 0    | 0            | 1  | 2.17 (0.1-11.5)   |
| 46                | Djasiman                        |        |                      | 2   | 3         | 1   | 2   | 0    | 2    | 0            | 10 | 21.74 (10.9-36.4) |
| 74                | Grippotyphosa                   |        |                      | 2   | 2         | 1   | 0   | 0    | 0    | 0            | 5  | 6.76 (2.2-15.1)   |
| 38                | Hardjo                          |        |                      | 1   | 1         | 0   | 0   | 0    | 0    | 0            | 2  | 5.26 (0.6-17.7)   |
| 74                | Icterohaemorrhagiae             |        |                      | 4   | 3         | 1   | 1   | 0    | 0    | 1            | 10 | 13.51 (6.7-23.5)  |
| 46                | Mankarso                        |        |                      | 1   | 3         | 1   | 1   | 0    | 0    | 0            | 6  | 13.04 (4.9-26.3)  |
| 74                | Pomona                          |        |                      | 5   | 1         | 3   | 1   | 2    | 0    | 2            | 14 | 18.92 (10.7-29.7) |
| 46                | Tarassovi                       |        |                      | 1   | 0         | 0   | 0   | 0    | 0    | 0            | 1  | 2.17 (0.1-11.5)   |
| Desert Cottontail | <i>Sylvilagus audubonii</i>     |        |                      | 27  | Georgia   | 0   | 0   | 0    | 1    | 0            | 0  | 0                 |
|                   |                                 | 30     | Icterohaemorrhagiae  | 1   | 0         | 0   | 0   | 0    | 0    | 0            | 1  | 3.33 (0.1-17.2)   |
|                   |                                 | 30     | Pomona               | 0   | 1         | 0   | 0   | 0    | 0    | 0            | 1  | 3.33 (0.1-17.2)   |
| Feral Pigs        | <i>Sus scrofa</i>               | 55     | Autumnalis           | 4   | 1         | 3   | 0   | 0    | 0    | 0            | 9  | 16.36 (7.8-28.8)  |
|                   |                                 | 55     | Bratislava           | 4   | 4         | 2   | 0   | 0    | 0    | 0            | 10 | 18.18 (9.1-30.9)  |
|                   |                                 | 55     | Canicola             | 1   | 0         | 0   | 0   | 0    | 0    | 0            | 1  | 1.82 (0-9.7)      |
|                   |                                 | 55     | Cynopteri            | 1   | 1         | 0   | 0   | 0    | 0    | 0            | 2  | 3.64 (0.4-12.5)   |
|                   |                                 | 55     | Djasiman             | 3   | 1         | 4   | 0   | 0    | 0    | 0            | 8  | 14.55 (6.5-26.7)  |
|                   |                                 | 55     | Georgia              | 0   | 1         | 0   | 0   | 0    | 0    | 0            | 1  | 1.82 (0-9.7)      |
|                   |                                 | 55     | Icterohaemorrhagiae  | 2   | 0         | 1   | 0   | 0    | 0    | 0            | 3  | 5.45 (1.1-15.1)   |
|                   |                                 | 55     | Mankarso             | 1   | 0         | 1   | 0   | 0    | 0    | 0            | 2  | 3.64 (0.4-12.5)   |
|                   |                                 | 55     | Pomona               | 2   | 0         | 1   | 0   | 1    | 1    | 2            | 7  | 12.73 (5.3-24.5)  |
|                   |                                 | 55     | Pyrogenes            | 0   | 1         | 0   | 0   | 0    | 0    | 0            | 1  | 1.82 (0-9.7)      |
| 55                | Tarassovi                       | 1      | 0                    | 0   | 0         | 0   | 0   | 0    | 1    | 1.82 (0-9.7) |    |                   |
| Fox Squirrel      | <i>Sciurus niger</i>            | 69     | Australis            | 2   | 0         | 0   | 0   | 0    | 0    | 0            | 2  | 2.9 (0.4-10.1)    |
|                   |                                 | 69     | Autumnalis           | 2   | 2         | 0   | 0   | 0    | 0    | 0            | 4  | 5.8 (1.6-14.2)    |
|                   |                                 | 110    | Bratislava           | 9   | 15        | 9   | 4   | 2    | 0    | 0            | 39 | 35.45 (26.6-45.1) |
|                   |                                 | 69     | Celledoni            | 1   | 0         | 0   | 0   | 0    | 0    | 0            | 1  | 1.45 (0-7.8)      |
|                   |                                 | 51     | Hardjo               | 8   | 16        | 7   | 2   | 1    | 0    | 0            | 34 | 66.67 (52.1-79.2) |
|                   |                                 | 110    | Icterohaemorrhagiae  | 29  | 15        | 9   | 5   | 1    | 1    | 0            | 60 | 54.55 (44.8-64.1) |
|                   |                                 | 69     | Javanica             | 1   | 0         | 0   | 0   | 0    | 0    | 0            | 1  | 1.45 (0-7.8)      |
|                   |                                 | 69     | Mankarso             | 1   | 1         | 1   | 0   | 0    | 0    | 0            | 3  | 4.35 (0.9-12.2)   |
|                   |                                 | 110    | Pomona               | 1   | 0         | 1   | 0   | 0    | 0    | 0            | 2  | 1.82 (0.2-6.4)    |
|                   |                                 | 69     | Pyrogenes            | 2   | 0         | 0   | 0   | 0    | 0    | 0            | 2  | 2.9 (0.4-10.1)    |
| Ground Squirrel   | <i>Otospermophilus beecheyi</i> | 4      | Bratislava           | 2   | 0         | 0   | 0   | 0    | 0    | 0            | 2  | 50 (6.8-93.2)     |
|                   |                                 | 4      | Hardjo               | 0   | 1         | 0   | 0   | 0    | 0    | 0            | 1  | 25 (0.6-80.6)     |
| Raccoon           | <i>Procyon lotor</i>            | 16     | Autumnalis           | 2   | 0         | 1   | 0   | 0    | 0    | 0            | 3  | 18.75 (4-45.6)    |
|                   |                                 | 135    | Bratislava           | 11  | 3         | 9   | 4   | 3    | 3    | 2            | 35 | 26.12 (18.9-34.4) |
|                   |                                 | 135    | Canicola             | 2   | 4         | 2   | 2   | 1    | 0    | 0            | 11 | 8.21 (4.2-14.2)   |
|                   |                                 | 16     | Celledoni            | 1   | 0         | 0   | 0   | 0    | 0    | 0            | 1  | 6.25 (0.2-30.2)   |
|                   |                                 | 16     | Cynopteri            | 1   | 0         | 0   | 0   | 0    | 0    | 0            | 1  | 6.25 (0.2-30.2)   |
|                   |                                 | 16     | Djasiman             | 1   | 1         | 1   | 0   | 0    | 0    | 0            | 3  | 18.75 (4-45.6)    |
|                   |                                 | 135    | Grippotyphosa        | 1   | 5         | 4   | 1   | 0    | 0    | 0            | 11 | 8.21 (4.2-14.2)   |
|                   |                                 | 122    | Hardjo               | 11  | 5         | 2   | 4   | 3    | 0    | 0            | 25 | 20.66 (13.8-29)   |
|                   |                                 | 135    | Icterohaemorrhagiae  | 13  | 9         | 5   | 5   | 1    | 2    | 1            | 36 | 26.87 (19.6-35.2) |
|                   |                                 | 16     | Mankarso             | 0   | 0         | 1   | 0   | 0    | 0    | 0            | 1  | 6.25 (0.2-30.2)   |
|                   |                                 | 135    | Pomona               | 6   | 10        | 8   | 9   | 7    | 3    | 12           | 55 | 40.74 (32.2-49.5) |
|                   |                                 | 16     | Pyrogenes            | 1   | 0         | 0   | 0   | 0    | 0    | 0            | 1  | 6.25 (0.2-30.2)   |
|                   |                                 | 16     | Tarassovi            | 0   | 0         | 1   | 0   | 0    | 0    | 0            | 1  | 6.25 (0.2-30.2)   |
| Red Fox           | <i>Vulpes vulpes</i>            | 4      | Autumnalis           | 0   | 0         | 1   | 0   | 0    | 0    | 0            | 1  | 25 (0.6-80.6)     |
|                   |                                 | 4      | Djasiman             | 0   | 1         | 0   | 0   | 0    | 0    | 0            | 1  | 25 (0.6-80.6)     |
|                   |                                 | 5      | Icterohaemorrhagiae  | 1   | 0         | 0   | 0   | 0    | 0    | 0            | 1  | 20 (0.5-71.6)     |
|                   |                                 | 4      | Mankarso             | 1   | 0         | 0   | 0   | 0    | 0    | 0            | 1  | 25 (0.6-80.6)     |
|                   |                                 | 5      | Pomona               | 0   | 1         | 0   | 0   | 0    | 0    | 0            | 1  | 20 (0.5-71.6)     |
|                   |                                 | 4      | Pyrogenes            | 1   | 0         | 0   | 0   | 0    | 0    | 0            | 1  | 25 (0.6-80.6)     |
| Striped Skunk     | <i>Mephitis mephitis</i>        | 8      | Autumnalis           | 2   | 0         | 0   | 1   | 0    | 0    | 0            | 3  | 37.5 (8.5-75.5)   |
|                   |                                 | 26     | Bratislava           | 0   | 1         | 0   | 0   | 0    | 0    | 0            | 1  | 3.85 (0.1-19.6)   |
|                   |                                 | 8      | Djasiman             | 1   | 0         | 1   | 0   | 0    | 0    | 0            | 2  | 25 (3.2-65.1)     |
|                   |                                 | 26     | Icterohaemorrhagiae  | 2   | 0         | 1   | 0   | 0    | 0    | 0            | 3  | 11.54 (2.4-30.2)  |
|                   |                                 | 8      | Mankarso             | 1   | 0         | 0   | 0   | 0    | 0    | 0            | 1  | 12.5 (0.3-52.7)   |
|                   |                                 | 26     | Pomona               | 2   | 0         | 2   | 0   | 1    | 0    | 2            | 7  | 26.92 (11.6-47.8) |
| Virginia Opossum  | <i>Didelphis virginiana</i>     | 129    | Bratislava           | 1   | 0         | 0   | 0   | 0    | 0    | 0            | 1  | 0.78 (0-4.2)      |
|                   |                                 | 75     | Hardjo               | 7   | 0         | 0   | 0   | 0    | 0    | 0            | 7  | 9.33 (3.8-18.3)   |
|                   |                                 | 129    | Icterohaemorrhagiae  | 2   | 0         | 0   | 0   | 0    | 0    | 0            | 2  | 1.55 (0.2-5.5)    |
|                   |                                 | 129    | Pomona               | 0   | 0         | 0   | 0   | 0    | 0    | 1            | 1  | 0.78 (0-4.2)      |

**Table S4: Comparison of *Leptospira* exposure and infection detected in this study centered in southern California, and by Straub and Foley (2020) centered in more northern regions of California. *Leptospira* antibody (MAT) and DNA (PCR) results are shown for our five target species.**

|                              | Common Name      | Scientific Name             | <i>Leptospira</i> Exposure (MAT) |     |                  | <i>Leptospira</i> Infections (PCR) |     |                    |
|------------------------------|------------------|-----------------------------|----------------------------------|-----|------------------|------------------------------------|-----|--------------------|
|                              |                  |                             | POS                              | n   | %POS (95% CI)    | POS                                | n   | %POS (95% CI)      |
| <b>This Study</b>            | Striped Skunk    | <i>Mephitis mephitis</i>    | 6                                | 21  | 28.6 (11.3-52.2) | 5                                  | 33  | 15.2 (5.1-31.9)    |
|                              | Raccoon          | <i>Procyon lotor</i>        | 31                               | 95  | 32.6 (23.4-43.0) | 14                                 | 162 | 8.6 (4.8-14.1)     |
|                              | Coyote           | <i>Canis latrans</i>        | 14                               | 54  | 25.9 (15.0-39.7) | 4                                  | 108 | 3.7 (1.0-9.2)      |
|                              | Virginia Opossum | <i>Didelphis virginiana</i> | 5                                | 97  | 5.2 (1.7-11.6)   | 1                                  | 131 | 0.8 (0.0-4.2)      |
|                              | Fox Squirrel     | <i>Sciurus niger</i>        | 66                               | 109 | 60.6 (50.7-69.8) | 0                                  | 148 | 0 (0.0-2.5)        |
| <b>Staub and Foley, 2020</b> | Striped Skunk    | <i>Mephitis mephitis</i>    | 78                               | 206 | 37.9 (31.5-44.7) | 40                                 | 141 | 28.4 (21.6-36.3)   |
|                              | Raccoon          | <i>Procyon lotor</i>        | 52                               | 119 | 43.7 (35.1-52.7) | 23                                 | 87  | 26.4 (18.3-36.6)   |
|                              | Coyote           | <i>Canis latrans</i>        | 6                                | 20  | 30.0 (14.5-51.9) | 2                                  | 2   | 100.0 (34.2-100.0) |
|                              | Virginia Opossum | <i>Didelphis virginiana</i> | 2                                | 32  | 6.3 (1.7-20.1)   | 1                                  | 6   | 16.7 (3.0-56.4)    |
|                              | Fox Squirrel     | <i>Sciurus niger</i>        | 15                               | 36  | 41.7 (27.1-57.8) | 4                                  | 31  | 12.9 (5.1-28.9)    |

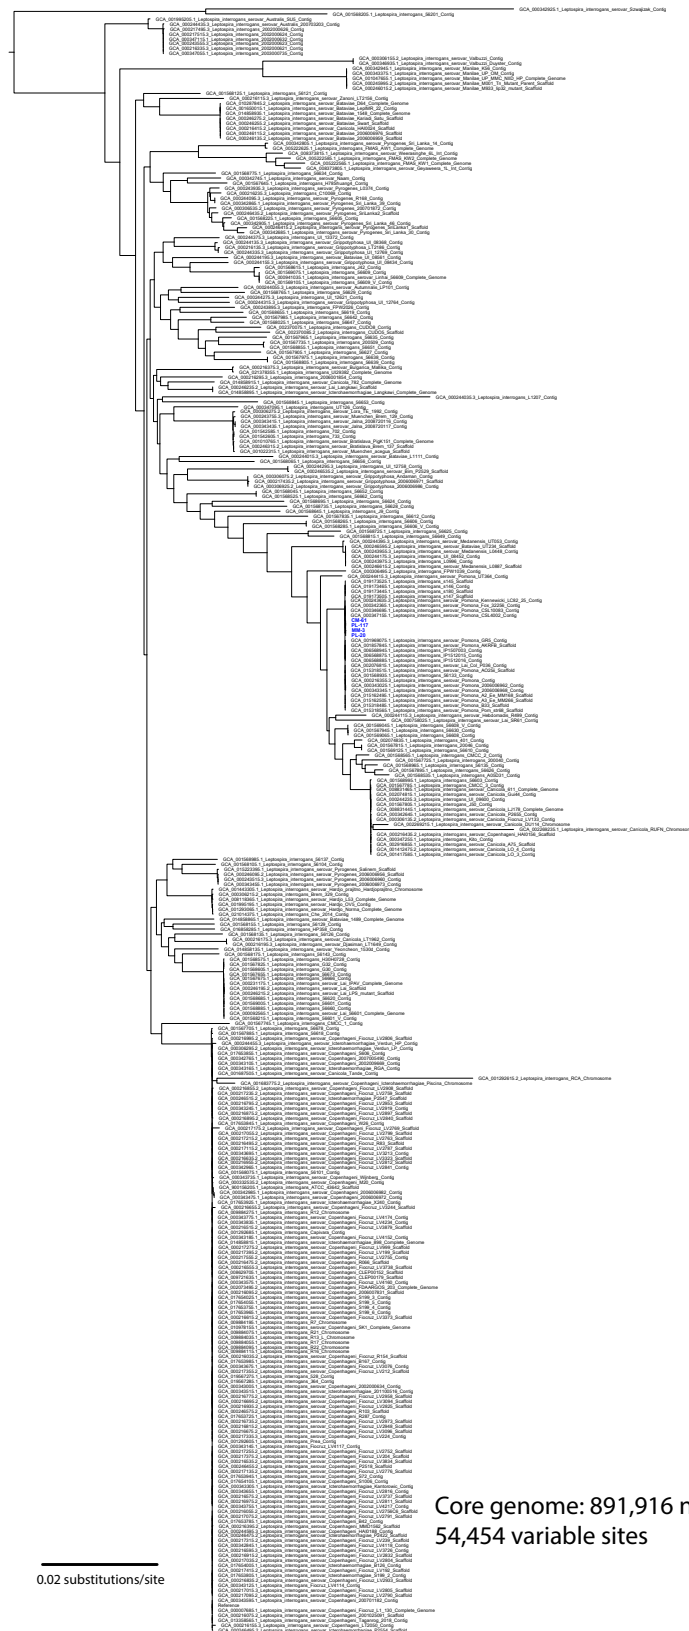

**Figure S1.** A maximum likelihood phylogeny of over 340 *L. interrogans* genomes together with enriched *Leptospira* genomic DNA from four PCR-positive animals in this study (highlighted with blue text) generated from one or two rounds of DNA capture and enrichment. Reads were mapped against *L. interrogans* serovar Copenhageni strain Fiocruz L1-130 (GCA\_000007685.1) and single nucleotide polymorphisms (SNPs) were called with GATK. The tree was inferred by IQ-TREE using the core genome shared by all four enriched samples and the publicly available genomes, corresponding to 19.27% [891,916 of 4,627,366 nucleotides (nts)] of the reference genome.

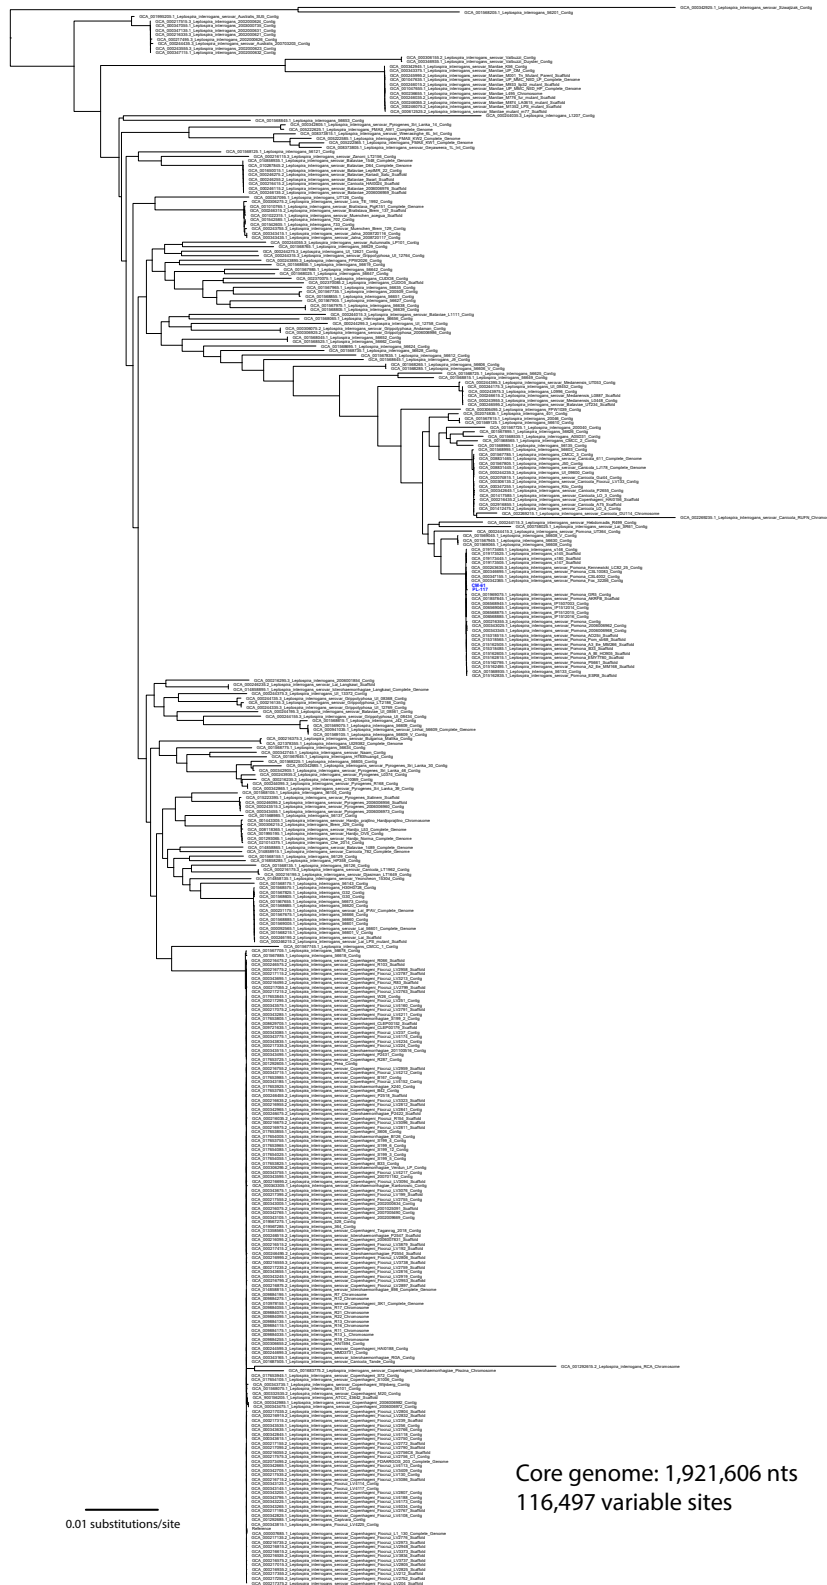

**Figure S2.** A maximum likelihood phylogeny of over 340 *L. interrogans* genomes together with enriched *Leptospira* genomic DNA from two PCR-positive animals in this study (highlighted with blue text ) generated from two rounds of DNA capture and enrichment. Reads were mapped against *L. interrogans* serovar Copenhageni strain Fiocruz L1-130 (GCA\_000007685.1) and single nucleotide polymorphisms (SNPs) were called with GATK. The tree was inferred by IQ-TREE using the core genome shared by two enriched samples and the publicly available genomes, corresponding to 41.53% [1,921,606 of 4,627,366 nucleotides (nts)] of the reference genome.

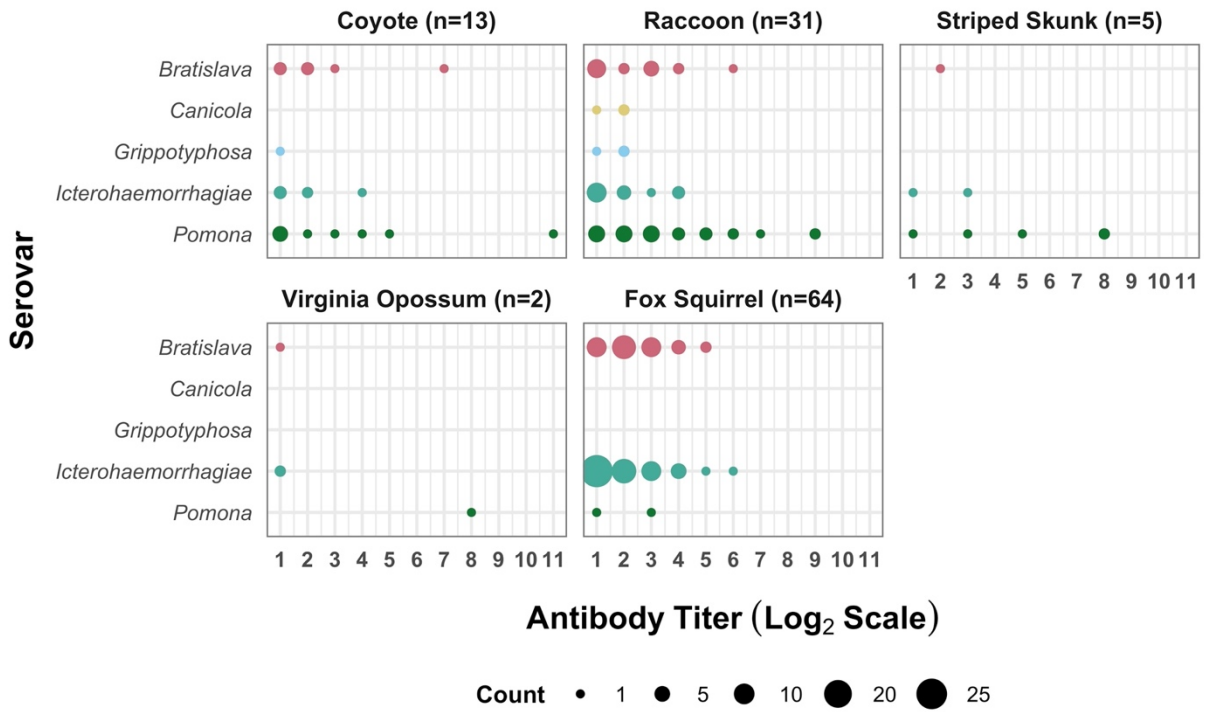

**Figure S3: Samples positive for antibodies shown by host species, serovar, and titer level.** Positive antibody results (MAT) for our five main serovars. Antibody titer (x-axis) is shown on a log<sub>2</sub> scale (1:100 equivalent to 1, 1:200 equivalent to 2, 1:400 equivalent to 3, etc.).

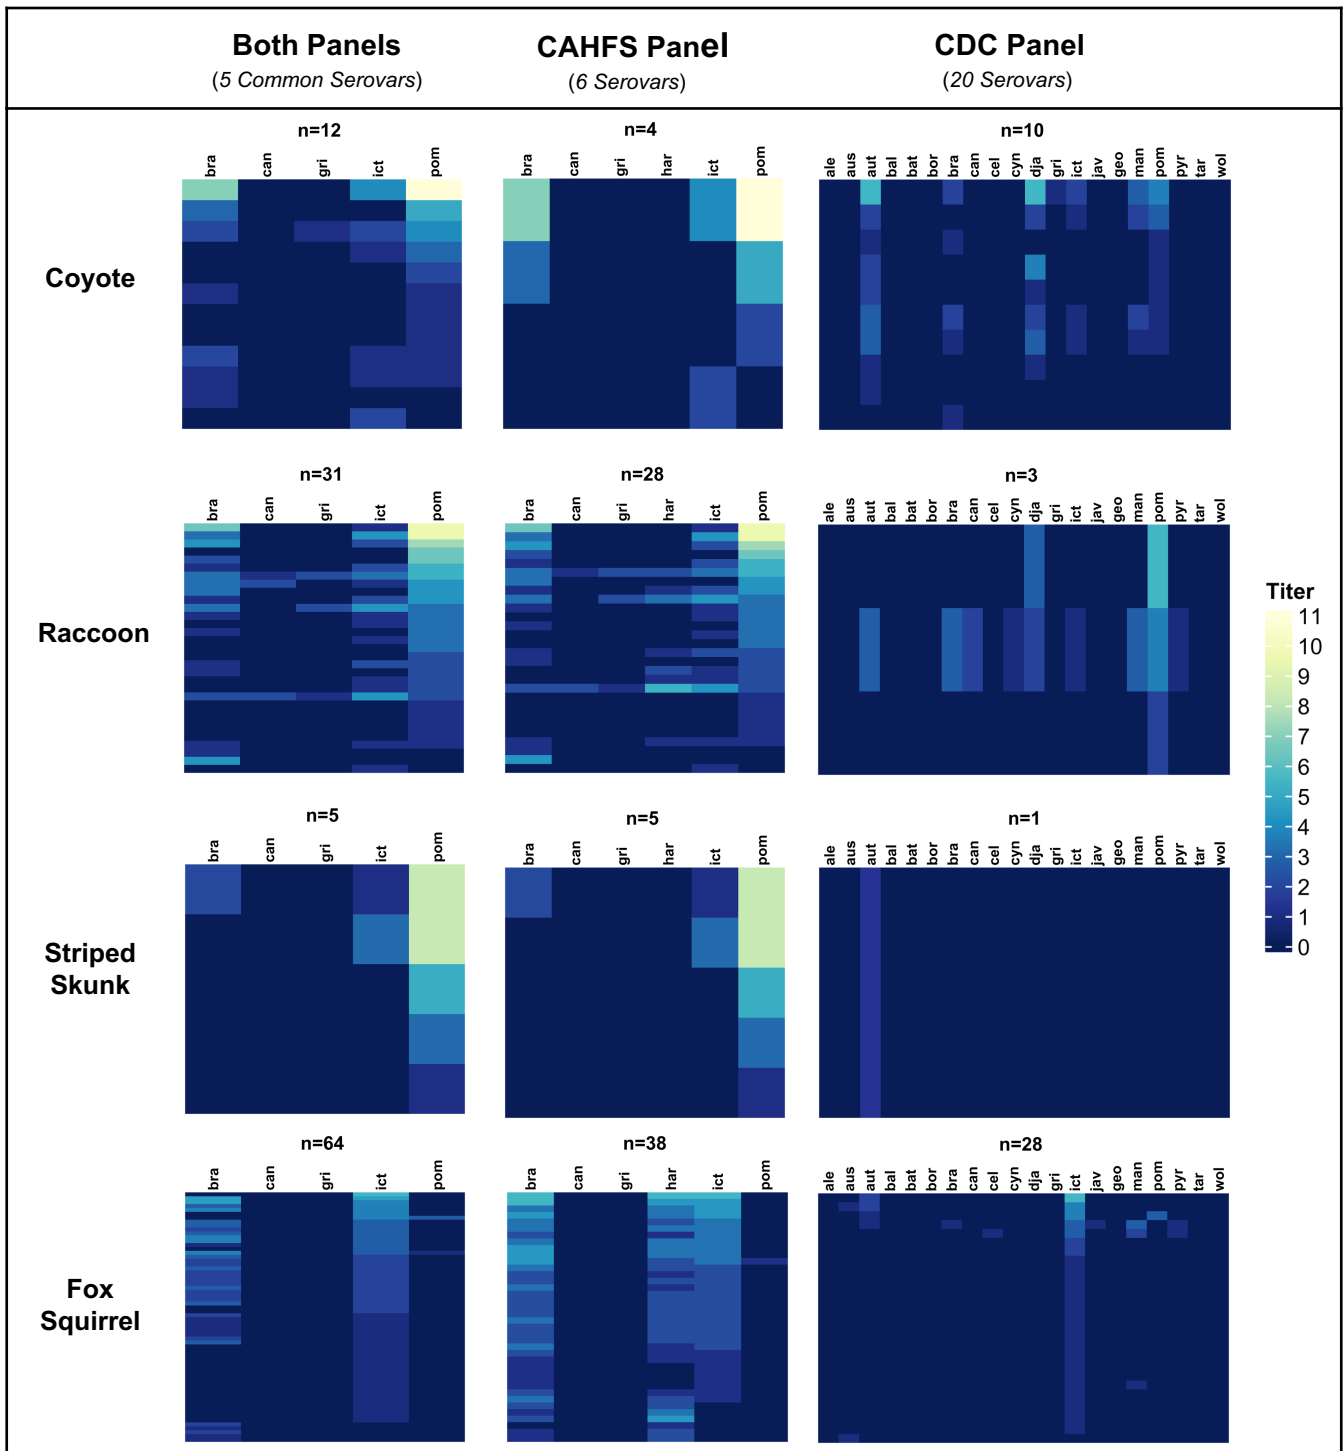

**Figure S4: Serovar reactivity profiles for target species in the greater Los Angeles region, displayed by laboratory.** All seropositive data are displayed for the serovars tested at both laboratories (left), CAHFS (middle) and CDC (right). Each row of colored bars represents MAT titers for an individual animal, with rows ordered by titer values for the serovar with the highest maximum titers in each species (serovar Pomona for coyotes, raccoons and skunks; serovar Icterohaemorrhagiae in fox squirrels). The colorbar legend shows antibody titer on a  $\log_2$  scale (1:100 equivalent to 1, 1:200 equivalent to 2, 1:400 equivalent to 3, etc.). Serovar results shown: Alexi ('ale'), Australis ('aus'), Autumnalis ('aut'), Ballum ('bal'), Bataviae ('bat'), Borincana ('bor'), Bratislava ('bra'), Canicola ('can'), Celledoni ('cel'), Cynopteri ('cyn'), Djasiman ('dja'), Grippotyphosa ('gri'), Hardjo ('har'), Icterohaemorrhagiae ('ict'), Javanica ('jav'), Georgia ('geo'), Mankarso ('man'), Pomona ('pom'), Pyrogenes ('pyr'), Tarassovi ('tar'), Wolffi ('wol').



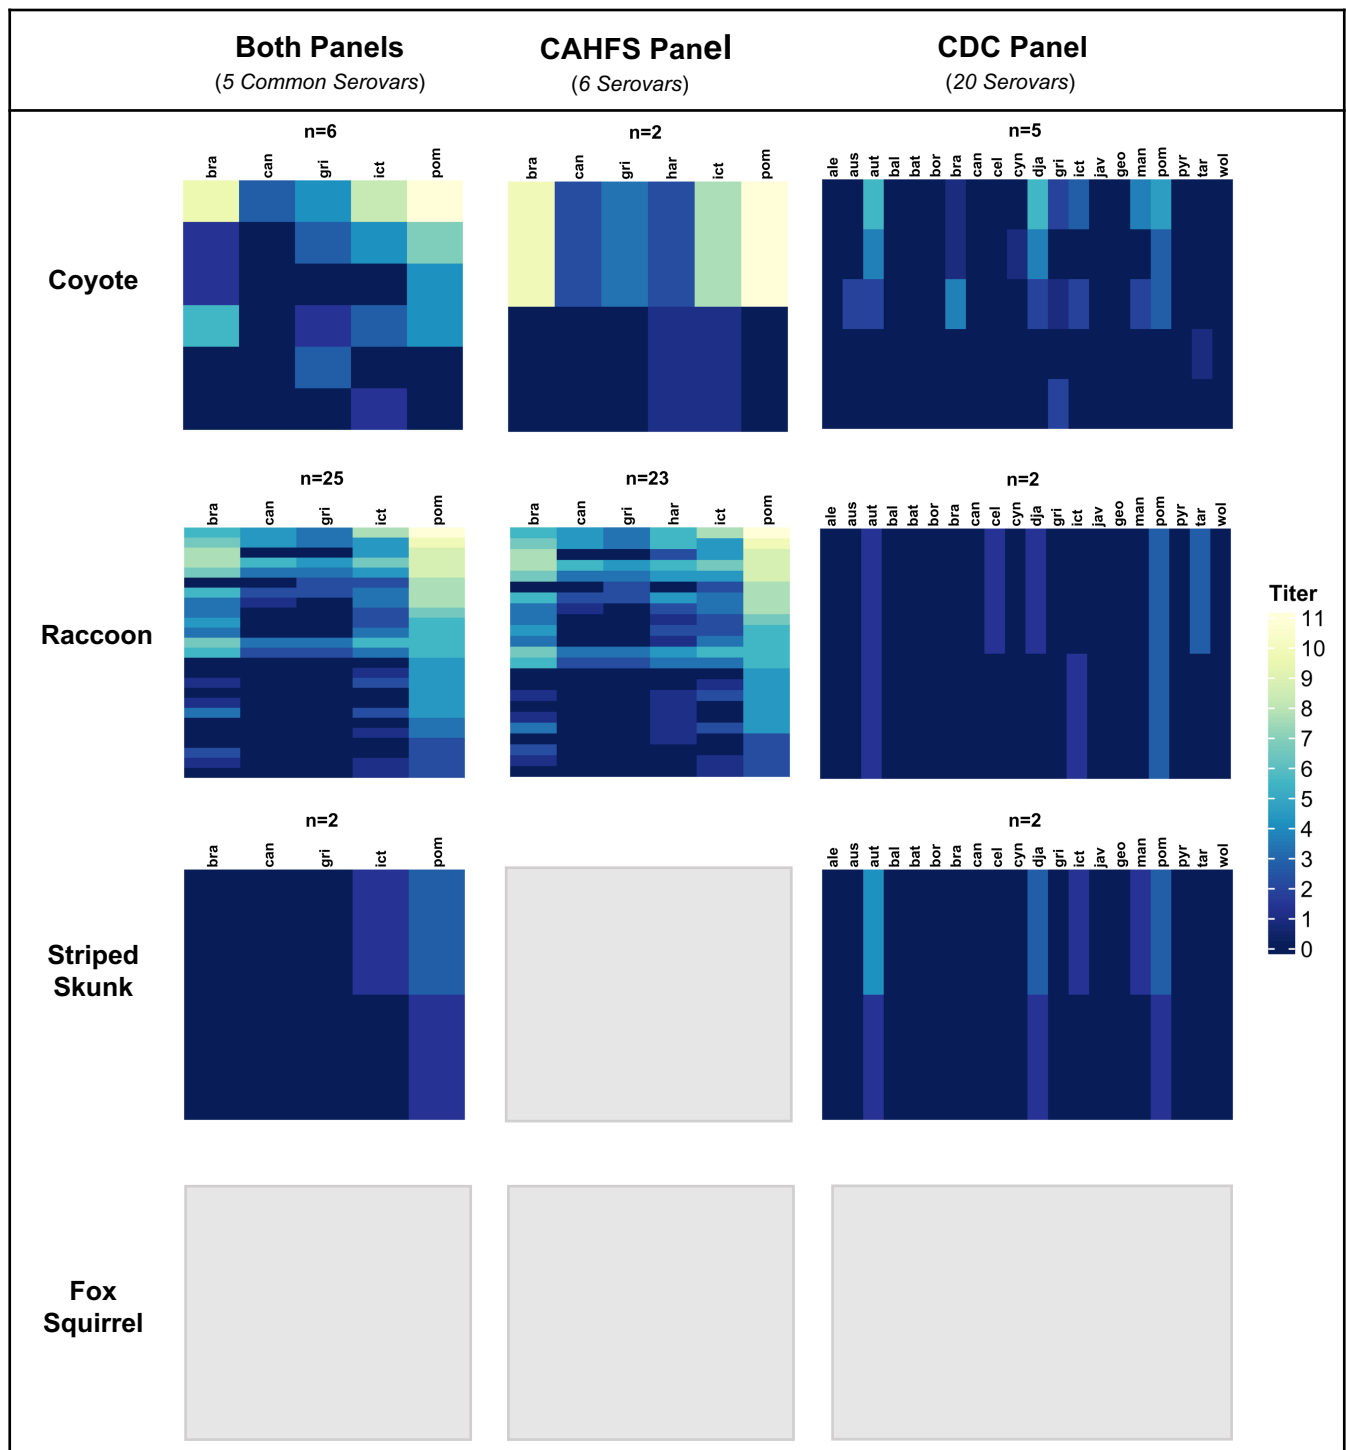

**Figure S5: Serovar reactivity profiles for target species outside the greater Los Angeles region, displayed by laboratory.** All seropositive data are displayed for the serovars tested at both laboratories (left), CAHFS (middle) and CDC (right). Gray boxes represent a lack of data. Each row of colored bars represents MAT titers for an individual animal, with rows ordered by titer values for the serovar with the highest maximum titers in each species (serovar Pomona for coyotes, raccoons and skunks; serovar Icterohaemorrhagiae in fox squirrels). The colorbar legend shows antibody titer on a  $\log_2$  scale (1:100 equivalent to 1, 1:200 equivalent to 2, 1:400 equivalent to 3, etc.). Serovar results shown: Alexi ('ale'), Australis ('aus'), Autumnalis ('aut'), Ballum ('bal'), Bataviae ('bat'), Borincana ('bor'), Bratislava ('bra'), Canicola ('can'), Celledoni ('cel'), Cynopteri ('cyn'), Djasiman ('dja'), Grippotyphosa ('gri'), Hardjo ('har'), Icterohaemorrhagiae ('ict'), Javanica ('jav'), Georgia ('geo'), Mankarso ('man'), Pomona ('pom'), Pyrogenes ('pyr'), Tarassovi ('tar'), Wolffi ('wol').

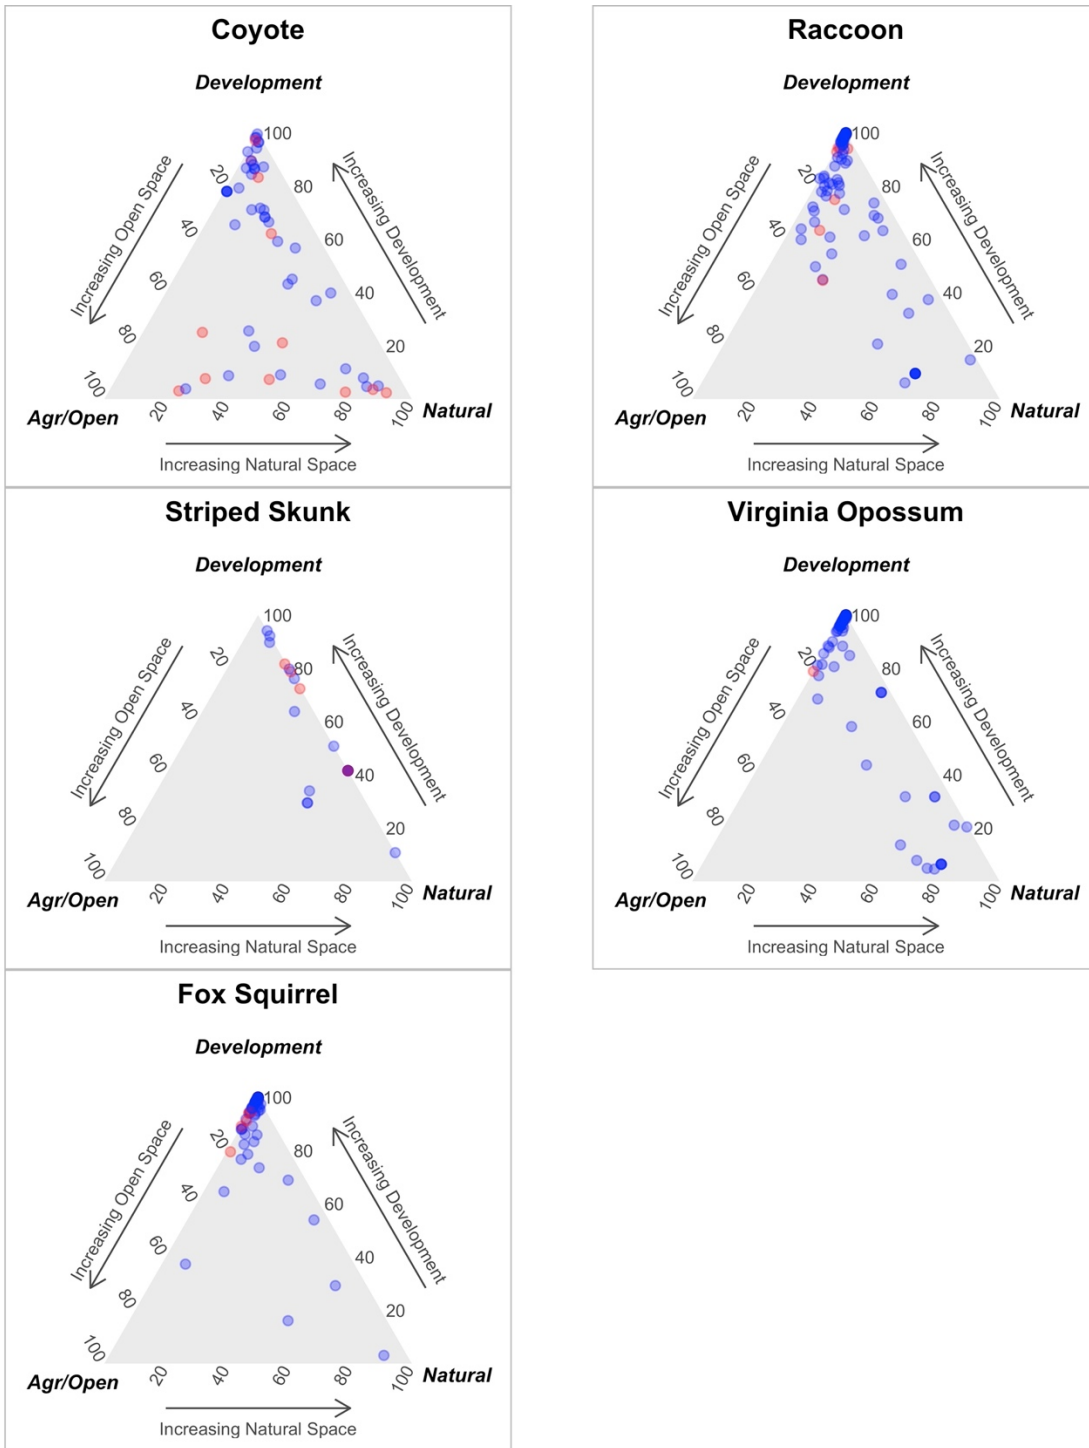

**Figure S6: *Leptospira* exposure relative to land classification for target species in the greater Los Angeles region.** Positive (red) and negative (blue) anti-*Leptospira* antibody (MAT) results are plotted relative to the proportion of natural, agricultural/open and developed land calculated within the home range buffer of each individual.
